# Supplementary material for: Block-copolymer-like self-assembly behavior of mobile-ligand grafted ultra-small nanoparticles
Source: Royal Society of Chemistry journal article supplement (doi:10.1039/d1sm00393c), 2021-01-01
Supplement: d1sm00393c1.pdf [file d1sm00393c1.pdf]

## Supporting Information

# Block-copolymer-like self-assembly behavior of mobile-ligand grafted ultra-small nanoparticles

*Feng-Rui Xu<sup>†,§</sup>, Rui Shi<sup>†,§</sup>, Xiang-Meng Jia<sup>†,§</sup>, Sheng-Chao Chai<sup>§</sup>, Hao-Long Li<sup>§</sup>, Hu-Jun Qian<sup>\*†,§</sup>, and Zhong-Yuan Lu<sup>†,§</sup>*

<sup>†</sup>Laboratory of Theoretical and Computational Chemistry, Institute of Theoretical Chemistry, College of Chemistry, Jilin University, Changchun 130022, China

<sup>§</sup>State Key Laboratory of Supramolecular Structure and Materials, College of Chemistry, Jilin University, Changchun 130012, China.

\*Corresponding author. E-mail: [hjqian@jlu.edu.cn](mailto:hjqian@jlu.edu.cn)

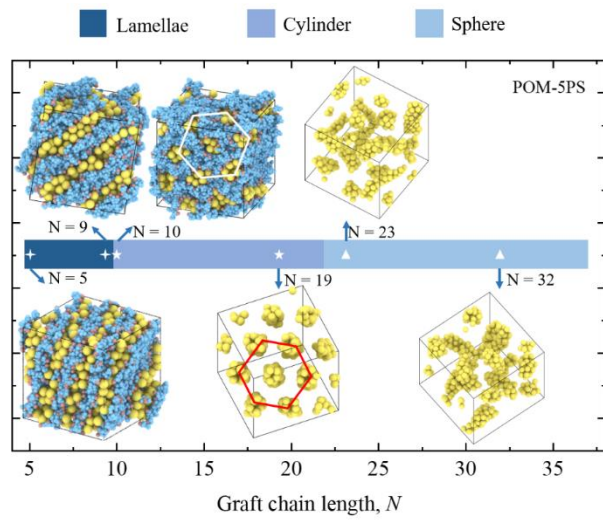

**Figure S1.** Phase boundary diagrams of POM-5PS with different graft chain length. Regions for different phases are shown in different colors as indicated by the legends.

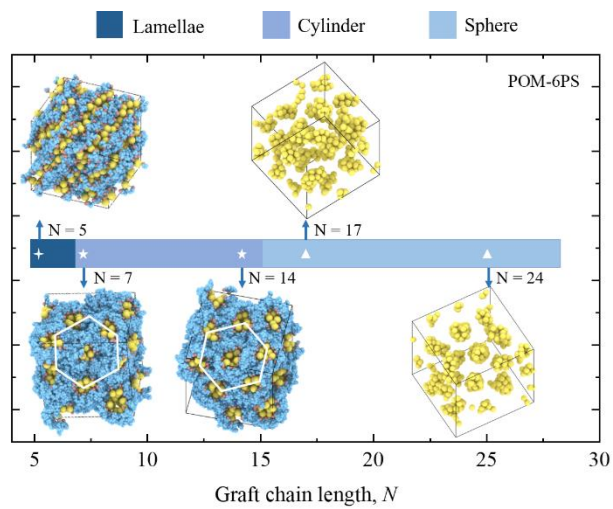

**Figure S2.** Phase boundary diagrams of POM-6PS with different graft chain length. Regions for different phases are shown in different colors as indicated by the legends.

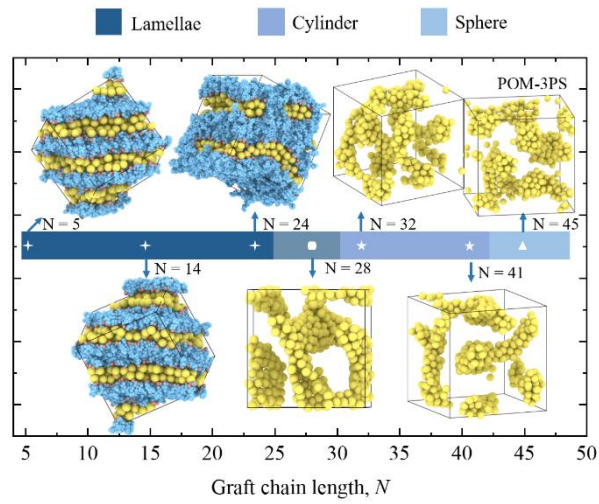

**Figure S3.** Phase boundary diagrams of POM-3PS with different graft chain length. Regions for different phases are shown in different colors as indicated by the legends.

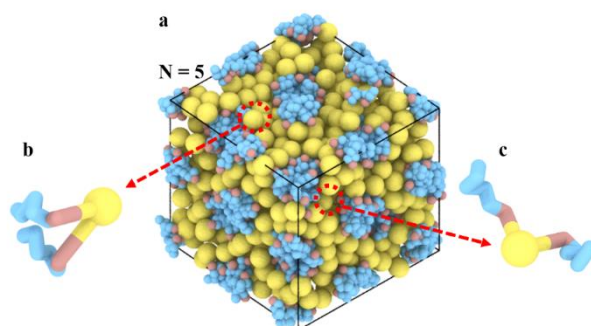

**Figure S4.** (a) Inverse cylinder structure formed by POM-2PS<sub>5</sub>; (b) and (c) two typical configurations of grafted polymers: (b) two PS chains are in the same cylinder, and (c) two PS chains are in two distinct cylinders.

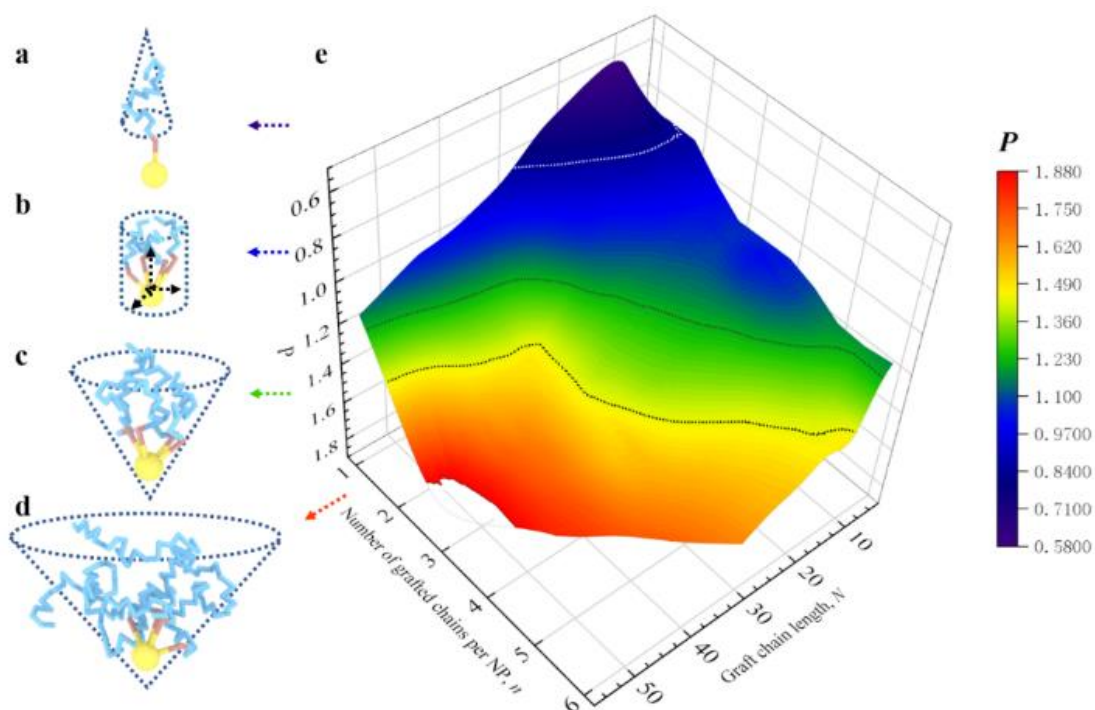

**Figure S5.** 3D plot of the calculated packing parameter  $P$  for systems with varied graft chain length  $N$  and graft density  $n$ . The pictures on the left show typical molecular conformation of PS grafted POM NP. The  $P$  value is shown in different colors as indicated by the color bars on the right.

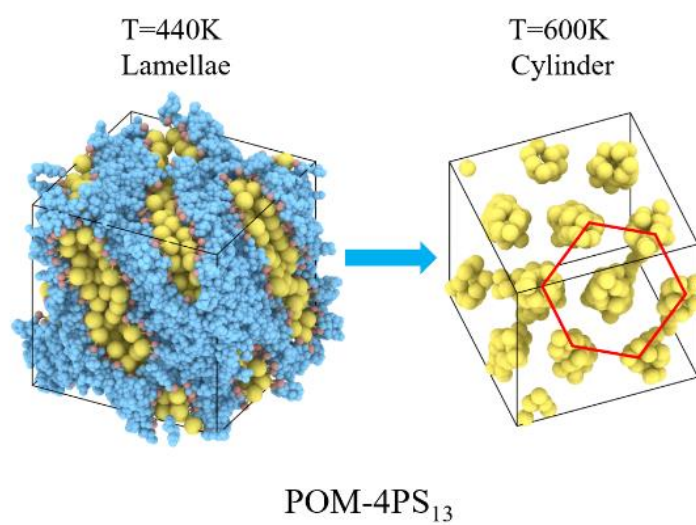

**Figure S6.** Transformation of a lamellae structure formed at 440 K for system POSS-4PS<sub>13</sub> to a cylinder structure when it is heated up to 600 K.
